# Supplementary material for: Intrinsic acidity and electrophilicity of gaseous propargyl/allenyl carbocations
Source: Royal Society of Chemistry journal article supplement (doi:10.1039/c001985b), 2010-01-01
Supplement: c001985b.pdf [file c001985b.pdf]

## Supplementary material

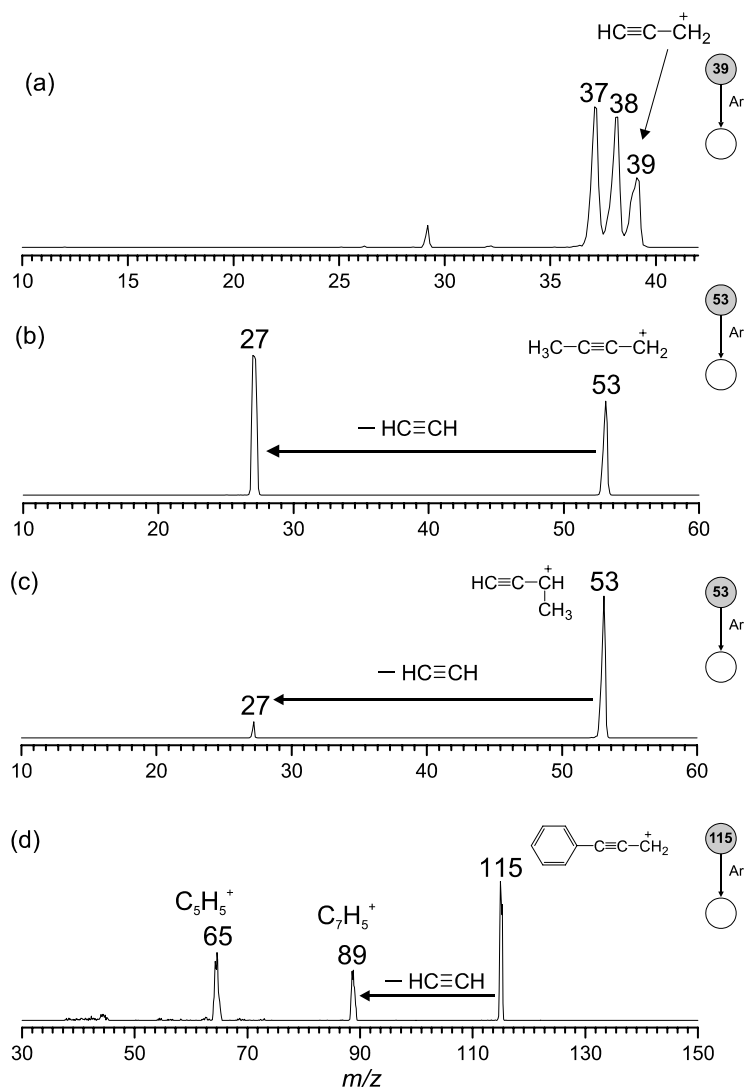

**Figure S1.** CID spectra for the parent ions (a) **1** of  $m/z$  39, (b) **2** of  $m/z$  53, (c) **3** of  $m/z$  53 and (d) **4** of  $m/z$  115.

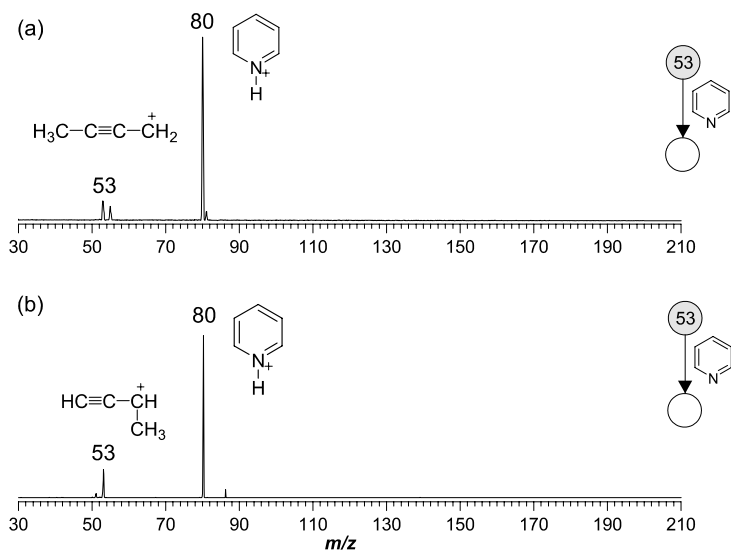

**Figure S2.** Double-stage ( $MS^2$ ) product ion mass spectra for ion/molecule reactions between pyridine and (a) **2** of  $m/z$  53 and (b) **3** of  $m/z$  53.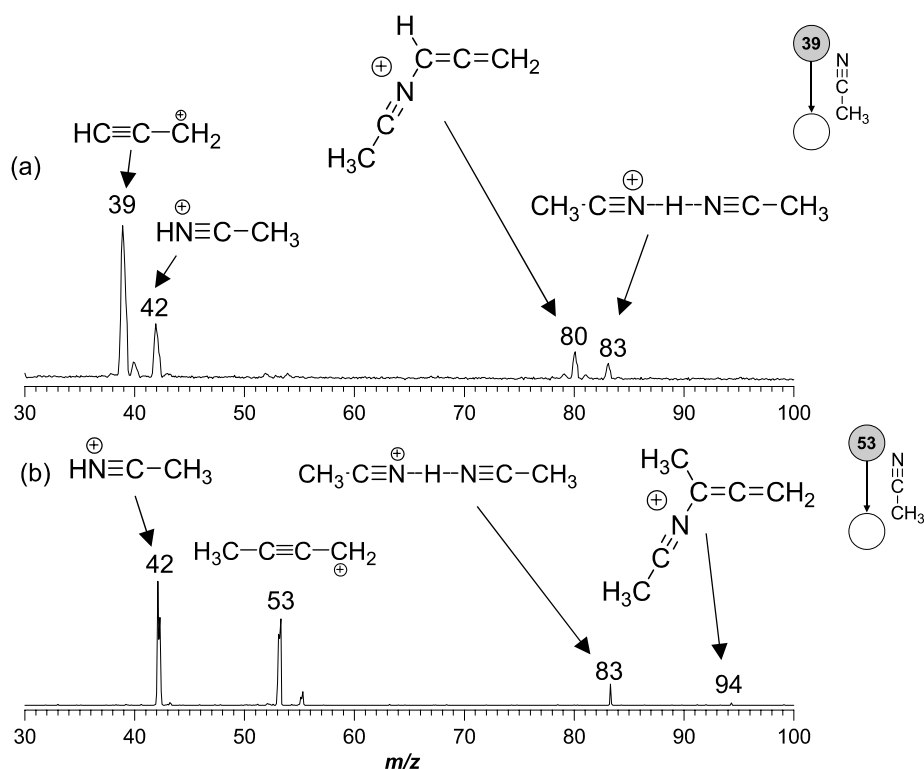**Figure S3.** Double-stage ( $MS^2$ ) product ion mass spectra for ion/molecule reactions between acetonitrile and (a) **1** of  $m/z$  39 and (b) **2** of  $m/z$  53.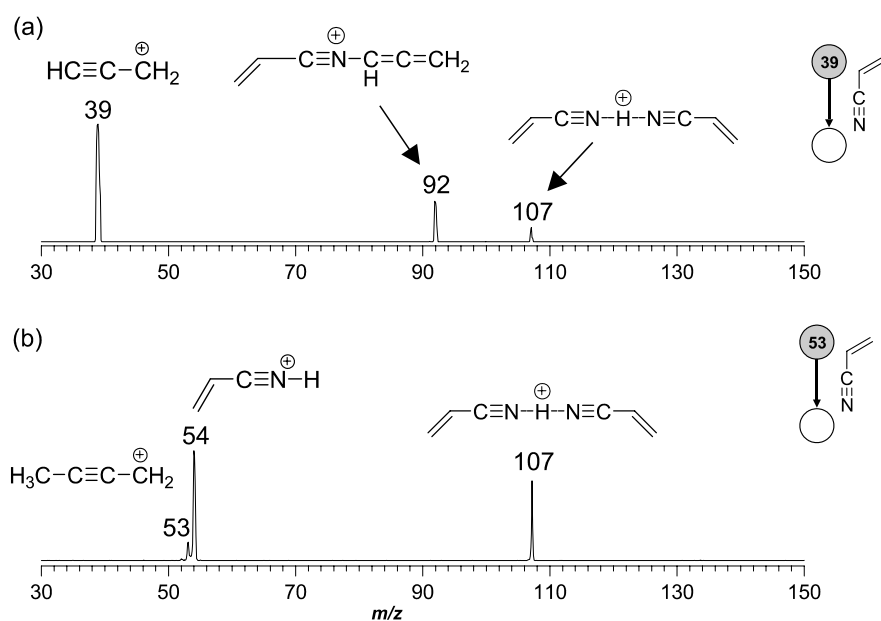**Figure S4.** Double-stage ( $MS^2$ ) product ion mass spectra for ion/molecule reactions between acrylonitrile and (a) **1** of  $m/z$  39 and (b) **2** of  $m/z$  53.

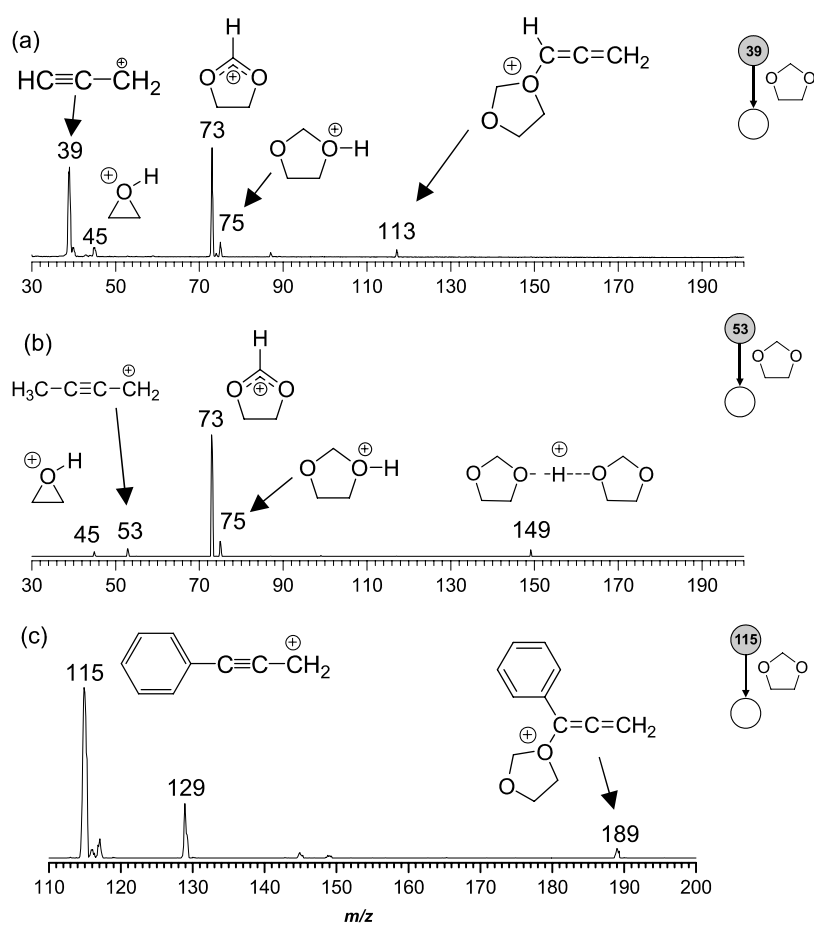

**Figure S5.** Double-stage ( $MS^2$ ) product ion mass spectra for ion/molecule reactions between 1,3-dioxolane and (a) **1** of  $m/z$  39, (b) **2** of  $m/z$  53 and (c) **4** of  $m/z$  115.

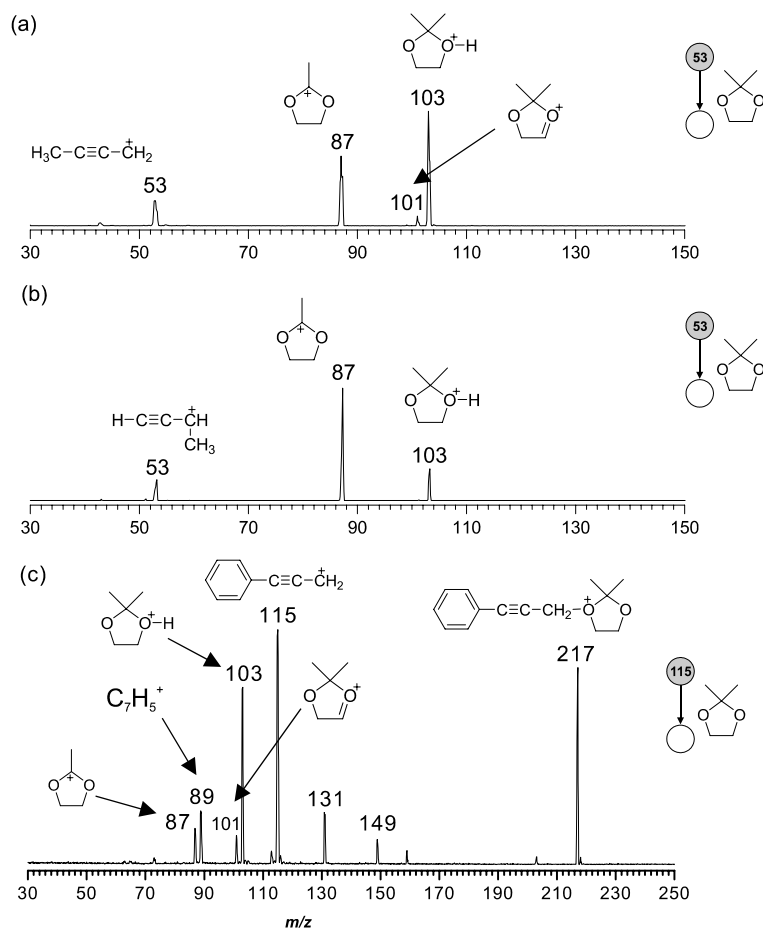

**Figure S6.** Double-stage ( $MS^2$ ) product ion mass spectra for ion/molecule reactions between 2,2-dimethyl-1,3-dioxolane and (a) **2** of  $m/z$  53, (b) **3** of  $m/z$  53 and (c) **4** of  $m/z$  115.

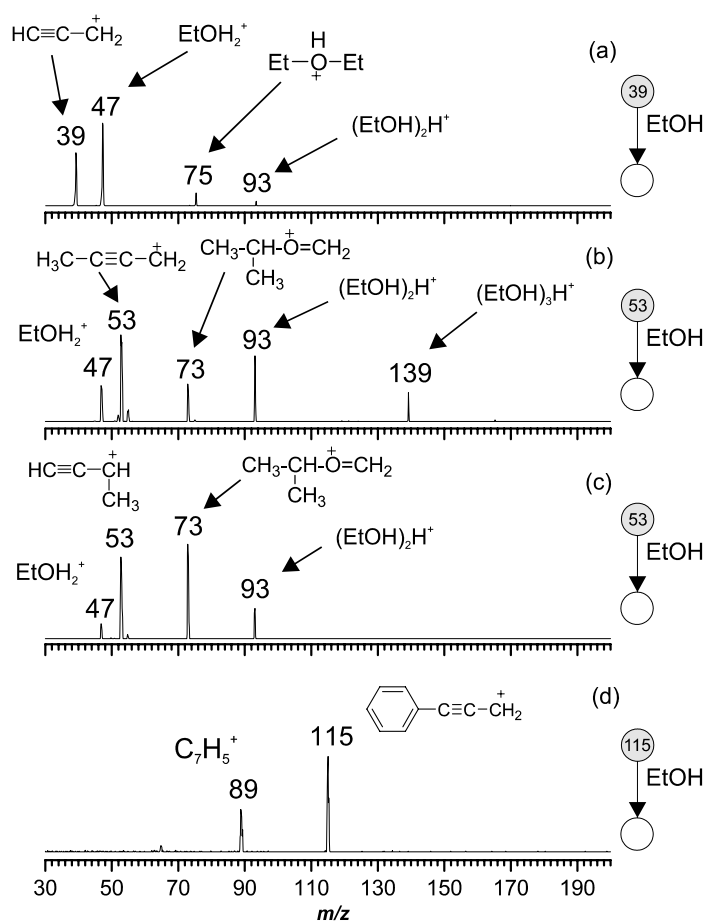

**Figure S7.** Double-stage (MS<sup>2</sup>) product ion mass spectra for ion/molecule reactions between ethanol and (a) **1** of *m/z* 39, (b) **2** of *m/z* 53, (c) **3** of *m/z* 53 and (d) **4** of *m/z* 115. Note that the ion of *m/z* 89 is a fragment of **4**.

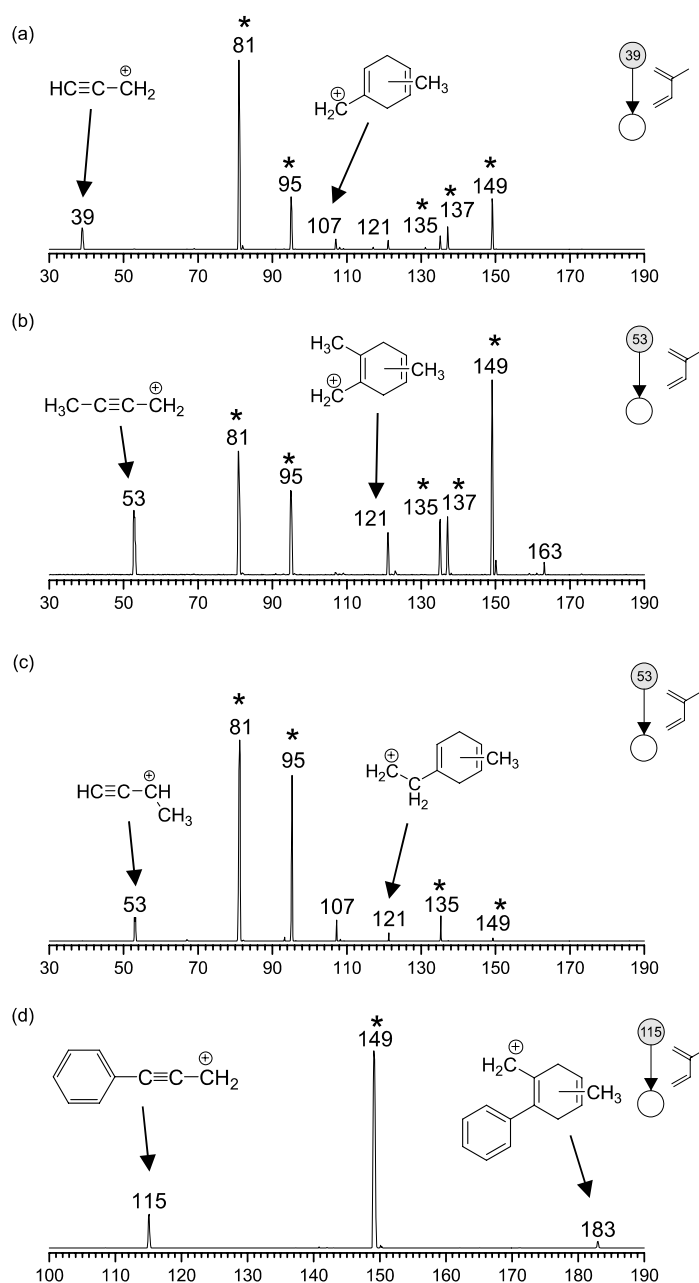

**Figure S8.** Double-stage ( $\text{MS}^2$ ) product ion mass spectra for ion/molecule reactions between isoprene and (a) **1** of  $m/z$  39, (b) **2** of  $m/z$  53, (c) **3** of  $m/z$  53 and (d) **4** of  $m/z$  115. The product ions of  $m/z$  81, 95, 135, 137 and 149 seem to arise from known reactions of protonated isoprene with neutral isoprene, see reference 29.
